# Supplementary material
Source: publisher figshare collection journal article supplement (https://springernature.figshare.com/ndownloader/files/38200749)

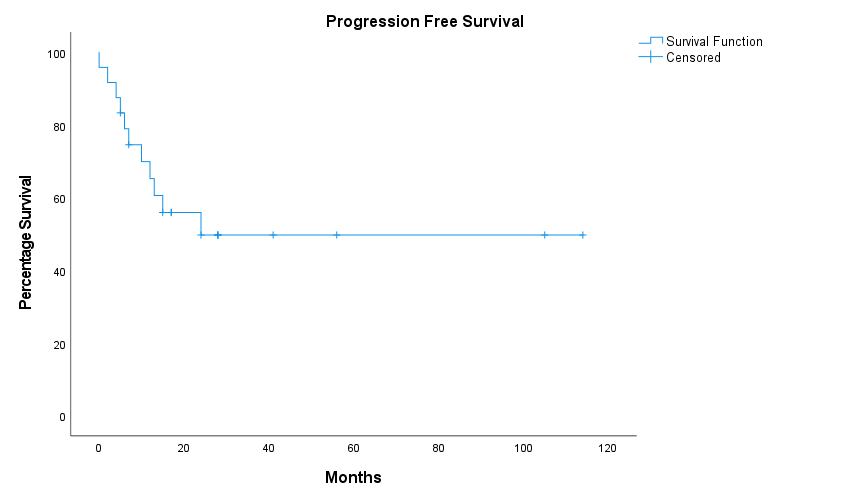

Supplement: Supplementary file 1 [file 38200749]
